# Supplementary material for: Visual and ocular findings in children with fetal alcohol spectrum disorders (FASD): validating the FASD Eye Code in a clinical setting
Source: HighWire-hosted journal article supplement (doi:10.1136/bmjophth-2022-001215), 2023-03-01
Supplement: bmjophth-2022-001215supp002_data_supplement.pdf [file bmjophth-2022-001215supp002_data_supplement.pdf]

**Supplemental file 2: The classification tables corresponding to the receiver operating characteristic curve analyses**

| <b>FASD versus healthy controls</b> |             |             |          |                           |                           |
|-------------------------------------|-------------|-------------|----------|---------------------------|---------------------------|
| Threshold                           | Specificity | Sensitivity | Accuracy | Positive likelihood ratio | Negative likelihood ratio |
| $-\infty$                           | 0%          | 100%        | 50%      | 1.0                       |                           |
| <b>4.5</b>                          | 57%         | 95%         | 76%      | 2.2                       | 0.1                       |
| <b>5.5</b>                          | 71%         | 90%         | 81%      | 3.2                       | 0.1                       |
| <b>6.5</b>                          | 85%         | 86%         | 86%      | 6.0                       | 0.2                       |
| <b>7.5</b>                          | 95%         | 52%         | 74%      | 11.0                      | 0.5                       |
| <b>8.5</b>                          | 100%        | 38%         | 69%      | $\infty$                  | 0.6                       |
| <b>9.5</b>                          | 100%        | 24%         | 62%      | $\infty$                  | 0.8                       |
| <b>10.5</b>                         | 100%        | 19%         | 60%      | $\infty$                  | 0.8                       |
| <b>12</b>                           | 100%        | 10%         | 55%      | $\infty$                  | 0.9                       |
| <b>13.5</b>                         | 100%        | 5%          | 52%      | $\infty$                  | 1.0                       |
| $\infty$                            | 100%        | 0%          | 50%      |                           | 1.0                       |

| <b>FAS versus healthy controls</b> |             |             |          |                           |                           |
|------------------------------------|-------------|-------------|----------|---------------------------|---------------------------|
| Threshold                          | Specificity | Sensitivity | Accuracy | Positive likelihood ratio | Negative likelihood ratio |
| $-\infty$                          | 0%          | 100%        | 40%      | 1                         |                           |
| <b>4.5</b>                         | 57%         | 93%         | 71%      | 2.17                      | 0.1                       |
| <b>5.5</b>                         | 71%         | 86%         | 77%      | 3                         | 0.2                       |
| <b>6.5</b>                         | 85%         | 79%         | 83%      | 5.5                       | 0.3                       |
| <b>7.5</b>                         | 95%         | 64%         | 83%      | 13.5                      | 0.4                       |
| <b>8.5</b>                         | 100%        | 50%         | 80%      | $\infty$                  | 0.5                       |
| <b>9.5</b>                         | 100%        | 36%         | 74%      | $\infty$                  | 0.6                       |
| <b>10.5</b>                        | 100%        | 29%         | 71%      | $\infty$                  | 0.7                       |
| <b>12</b>                          | 100%        | 14%         | 66%      | $\infty$                  | 0.9                       |
| <b>13.5</b>                        | 100%        | 7%          | 63%      | $\infty$                  | 0.9                       |
| $\infty$                           | 100%        | 0%          | 60%      |                           | 1.0                       |
